# Supplementary material
Source: Springer Nature journal article supplement (https://www.springermedizin.de/resource/supplementary/12906_2012_1345_MOESM2_ESM.pdf/9522516)

A

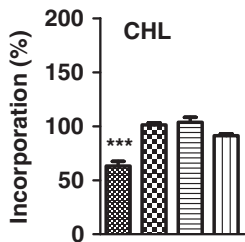

B

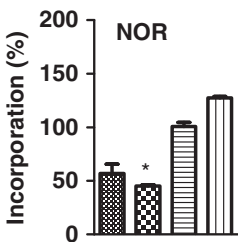

C

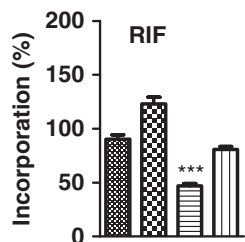

D

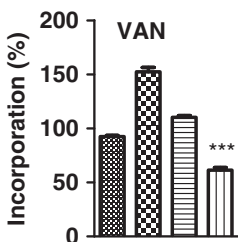

E

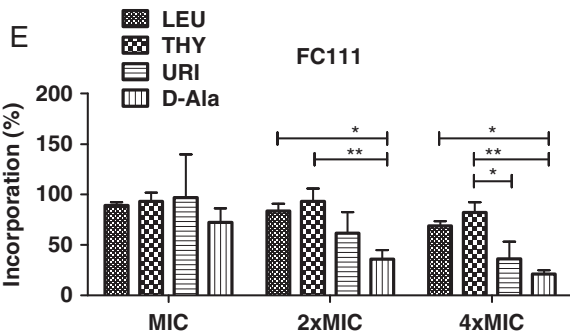

Supplement: MOESM2 [file 9522516]
